1 **Antibiotic Utilisation Patterns in Tanzania: A Retrospective Longitudinal Study**  
2 **Comparing Pre- and Post-COVID-19 Pandemic Using Tanzania Medicines and Medical**  
3 **Devices Authority Data**

4 **Raphael Z. Sangeda<sup>1</sup>, Sahani M. William<sup>1</sup>, Faustine Cassian Masatu<sup>2</sup>, Adonis Bitegeko<sup>2</sup>,**  
5 **Yonah Hebron Mwalwisi<sup>2</sup>, Emmanuel Alphonse Nkiligi<sup>2</sup>, Pius Gerald Horumpende<sup>3,4,5</sup>,**  
6 **Adam M. Fimbo<sup>2</sup>**

7 <sup>1</sup>Department of Pharmaceutical Microbiology, Muhimbili University of Health and Allied  
8 Sciences, PO Box 65013, Dar es Salaam, Tanzania

9 <sup>2</sup>Tanzania Medicines and Medical Devices Authority, PO Box 1253, Dodoma, Tanzania

10 <sup>3</sup>Department of Curative Services, Ministry of Health, P.O. Box 743 Dodoma, Tanzania.  
11 College, Moshi, Tanzania

12 <sup>4</sup>Kilimanjaro Clinical Research Institute (KCRI), Moshi, Tanzania

13 <sup>5</sup>Lugalo Infectious Diseases Research Centre, General Military Hospital (GMH) and Military  
14 College of Medical Sciences (MCMS), P.O. Box 4000 Dar es Salaam, Tanzania

15

16 \*Correspondence to Raphael Zozimus Sangeda email: [sangeda@gmail.com](mailto:sangeda@gmail.com)

17

18 **Short title: Influence of COVID-19 on Antibiotic Utilization Patterns in Tanzania**

19 **Synopsis**

20 Background: Antimicrobial resistance (AMR) is a growing public health concern globally, and  
21 misuse of antibiotics is a major contributor.

22 Objective: This study investigated antibiotic utilisation patterns before and after the COVID-19  
23 pandemic in Tanzania using data from the Tanzania Medicines and Medical Devices Authority  
24 (TMDA).

25 Methods: This retrospective longitudinal study analysed secondary data. The study compared  
26 antibiotics consumption in defined daily doses (DDD) per 1000 inhabitants per day (DID) in two  
27 distinct eras: 2018-2019 as the pre-COVID-19 era and 2020-2021 as the post-COVID-19 era.  
28 Data was reorganised using Microsoft Power BI, and statistical analysis was conducted using  
29 SPSS software.

30 Results: The study analysed 10,614 records and found an overall increase in antibiotics  
31 consumption from 2018 to 2021. When we divided the consumption of antibiotics into a pre- and  
32 post-COVID time period, with the pre-COVID period being 2018 and 2019 and the post-COVID  
33 period being 2020 and 2021, we found that the consumption was 61.24 DID in the post-COVID  
34 era and 50.32 DID in the pre-COVID era. Levofloxacin had the highest percentage increase in  
35 use, with a 700% increase in DID after the pandemic. Azithromycin had a 163.79% increase,  
36 while cefotaxime had a 600% increase. In contrast, some antibiotics exhibited a decrease in  
37 usage after the pandemic, such as nalidixic acid, which had a 100% decrease, and cefpodoxime,  
38 66.67% decrease.

39 Conclusion: The increase in antibiotic consumption during the COVID-19 pandemic highlights  
40 the importance of implementing effective antimicrobial stewardship strategies to prevent AMR,  
41 especially during pandemics.

42

## 43 **Introduction**

44 Antimicrobial resistance (AMR) poses a serious global health threat by hindering the treatment  
45 of bacterial infections.<sup>1</sup> In low and middle-income countries (LMICs), Tanzania included, the  
46 misuse and overuse of antibiotics have resulted in high rates of AMR, making it challenging to

47 treat bacterial infections<sup>2,3</sup>. Proper regulation and minimal consumption of antibiotics are crucial  
48 in reducing the prevalence of AMR in LMICs<sup>2</sup>.

49 To increase healthcare professionals' capacity for health safety and security and provide  
50 awareness on the appropriate use of antibiotics to reduce the development of AMR, global  
51 partnerships such as the Global Health Security Agenda (GHSA) and Antimicrobial Stewardship  
52 Programs (ASP) have been created. However, the COVID-19 pandemic has led to increased use  
53 of antibiotics due to the absence of antiviral therapies, which may contribute to further  
54 development of AMR. The second reason for increased antibiotics use has been the lack of  
55 proper infection prevention control (IPC) measures in public areas and hospitals.<sup>4</sup>

56 The government of Tanzania has implemented various programs to provide affordable healthcare  
57 services to the population, including a pre-payment system and health insurance scheme. Further,  
58 the Parliament of Tanzania has recently passed a bill for universal health insurance, awaiting the  
59 President's signature into law. However, achieving universal health coverage in Tanzania  
60 remains challenging as many citizens still lack access to proper healthcare services and have  
61 access to antibiotics without a prescription.<sup>5</sup>

62 The World Health Organization (WHO) has promulgated several guidelines for countries  
63 embarking on AMS to optimise antibiotics prescription and dispensing. One such guideline is  
64 using the AWaRe (Access, Watch, Reserve) classification of antibiotics in reporting AMU  
65 data.<sup>6</sup> According to this AWaRe classification, the Access group consists of antibiotics with  
66 activity against a wide range of commonly encountered susceptible bacteria with lower  
67 resistance potential than antibiotics in the other groups. The Watch class consists of antibiotics  
68 with higher resistance potential and includes most of the highest priority agents among the  
69 critically important antimicrobials for human use. The Reserve group includes antibiotics and

70 antibiotic classes that should be reserved to treat confirmed or suspected infections due to multi-  
71 drug-resistant organisms. Reserve group antibiotics should be treated as "last resort" options.<sup>7,8</sup>  
72 This classification emphasises using the reserve group sparingly to preserve strong antibiotics for  
73 serious infections. Other guidelines include the Anatomical Therapeutic Chemical (ATC)  
74 classification system and the daily defined dose (DDD) system to allow for international  
75 standardisation in AMU studies and permit comparison across geographical regions.<sup>9</sup>

76 At the onset of the COVID-19 outbreak in Tanzania in March 2020<sup>10,11</sup> clinicians began  
77 administering antibiotics to patients presenting with clinical signs such as cough, fever, and  
78 radiological infiltrate indicative of bacterial community-acquired pneumonia. The absence of  
79 antiviral therapies with proven efficacy also contributed to the widespread and excessive  
80 prescription of antibiotics, leading to increased antimicrobial resistance during the pandemic<sup>11-13</sup>.

81 Implementing proper antibiotic stewardship programs and increasing awareness of the  
82 appropriate use of antibiotics among healthcare professionals and the general public is pivotal in  
83 combating AMR. Collaboration among stakeholders is necessary to ensure effective treatment of  
84 bacterial infections to combat AMR.<sup>14</sup>

85 In Tanzania, AMS efforts underpinned in the National Action Plan (NAP) were launched<sup>15,16</sup> in  
86 2017 and the second version<sup>17</sup> in 2022 to help combat AMR. In 2020, the emergence of the  
87 COVID-19 pandemic impacted many aspects of life, including antimicrobial use (AMU) in  
88 Tanzania and globally. However, there is a paucity of AMU data in Tanzania comparing pre and  
89 post-COVID-19 eras to guide AMS. The Tanzania Medicines and Medical Devices Authority  
90 (TMDA) regulates the use of antibiotics in the country and collects data on their utilization<sup>15</sup>.  
91 TMDA's data on antibiotics utilisation can provide valuable information to develop effective  
92 strategies to combat AMR in Tanzania. Therefore, this study aimed to investigate the change in

93 antibiotic utilisation patterns before and after the COVID-19 pandemic in Tanzania, using  
94 TMDA data from 2018 to 2021 to determine the trends of use before and during the COVID-19  
95 pandemic outbreak in Tanzania.

## 96 **Methods**

### 97 **Study design**

98 This retrospective and longitudinal study used data from the Tanzania Medicines and Medical  
99 Devices Authority (TMDA), covering four years from 2018 to 2021.

### 100 **Study area**

101 The study was conducted in Tanzania Mainland, and the data were collected from TMDA  
102 headquarters in Dodoma. The TMDA compiled all importation data at different ports of entry  
103 from January 2018 to December 2021, which were included in this study.

### 104 **Inclusion criteria**

105 The study included all records of antibiotics for intended human use administered systemically.

### 106 **Exclusion criteria**

107 Antifungals, antivirals, antiparasitic and topical antibiotics and non-antibiotics were excluded  
108 from the study.

### 109 **Data collection**

110 Data were obtained from the TMDA headquarters in Dodoma, where individual importation data  
111 were recorded from January 2018 to December 2021. The data collected include product  
112 descriptions, generic and trade names, strengths, dosage forms, pack sizes, price, quantities, unit  
113 prices, import permits identification, issue dates, supplier names, countries, and local importers.

114 The TMDA is the National Medicines Regulatory Authority (NMRA) responsible for regulating  
115 the importation of medicines into the Tanzanian mainland market. The TMDA has developed  
116 and issued regulations and procedures that compel importers to apply for an importation permit.  
117 Importers' applications are evaluated, and import permits are issued and archived in the  
118 Regulatory Information Management System (RIMS), from which the records of imported  
119 medicines can be retrieved <sup>15</sup>. The data included antibiotic generic name, country of origin, ATC  
120 class, imports, and WHO AWaRe classification status of antibiotics received. The WHO ATC  
121 classification system categorised antibiotics into their respective classes.

122 Results were expressed using the Daily Defined Doses (DDD) measurement units. Utilisation  
123 was expressed in DDD per 1000 inhabitants per day (DID) in accordance with the ATC/DDD  
124 WHO collaborating Center for Statistics Methodology <sup>18</sup>.

## 125 **Data analysis**

126 Data collected were checked for completeness, accuracy, and omissions using Microsoft Power  
127 BI. Homogeneous data were clustered and coded for easy analysis, and the findings were  
128 presented in tables and graphs. Statistical analysis such as paired samples t-test was conducted in  
129 Statistical Package for the Social Sciences (SPSS) version 26.0 to assess the impact of the pre-  
130 and post-COVID-19 pandemic on antibiotics consumption in Tanzania. Time series and  
131 regression analyses were performed to predict the annual trend of antibiotic utilisation. An  
132 autoregressive integrated moving average (ARIMA, 0, 1, 0) model was established to predict the  
133 trends of antibiotic use. A *p*-value of less than 0.05 was considered statistically significant.

134 **Ethical considerations**

135 Ethical clearance was obtained from the Directorate of Research and Publications of the  
136 Muhimbili University of Health and Allied Sciences (MUHAS) with reference number DA.  
137 25/111/28/01/2021. The TMDA granted permission to collect and use its accrued data. Data  
138 privacy and confidentiality were observed throughout the study. Patient identifying information  
139 was not collected since this did not involve direct patient contact; instead, secondary data from  
140 the TMDA importation records was used.

141 **Results**

142 A total of 10,627 records were retrieved from the TMDA information management system. Of  
143 these, 9,610 were antibiotics imported for systemic use in humans between 2018 and 2021. A  
144 total of 1,017 records were excluded because they referred to antibiotics for either topical or  
145 veterinary use, as they were non-J (01) level 2 ATC class and 2022 imports. A total of 117.02  
146 DID was utilised in Tanzania between 2018 and 2021 (Table 1), with a mean (standard  
147 deviation) of 29.25 ( $\pm 4.63$ ) DIDs.

148 **Table 1: Annual distribution of DIDs and number of permits of antibiotics imported in**  
149 **Tanzania between 2018 and 2021**

| <b>Year</b>  | <b>DID</b>      | <b>Number of Permits</b> |
|--------------|-----------------|--------------------------|
| <b>2018</b>  | 30.39831        | 2,491                    |
| <b>2019</b>  | 22.53625        | 2,426                    |
| <b>2020</b>  | 30.96806        | 2,152                    |
| <b>2021</b>  | 33.11989        | 2,541                    |
| <b>Total</b> | <b>117.0225</b> | <b>9,610</b>             |

150 Key: DID: Daily Defined Dose per 1000 inhabitants per day

151 The year 2021 had the highest DID at 33.1, 47.0% higher than 2019, with the lowest DID at  
152 22.5. The consumption in 2021 accounted for 28.30% of DIDs. Annual cumulative DID started  
153 shooting up in 2020, where cumulative yearly DID reached 83.9 of the total 117.02 for the four  
154 years.

155 Tanzania imports these antibiotics from across continents and Kenya, India, and China were the  
156 major sources of antibiotics in the pre- and post-COVID-19 eras. Tanzania and South Africa  
157 were sources of antibiotics only during the pandemic era (Figure 1).



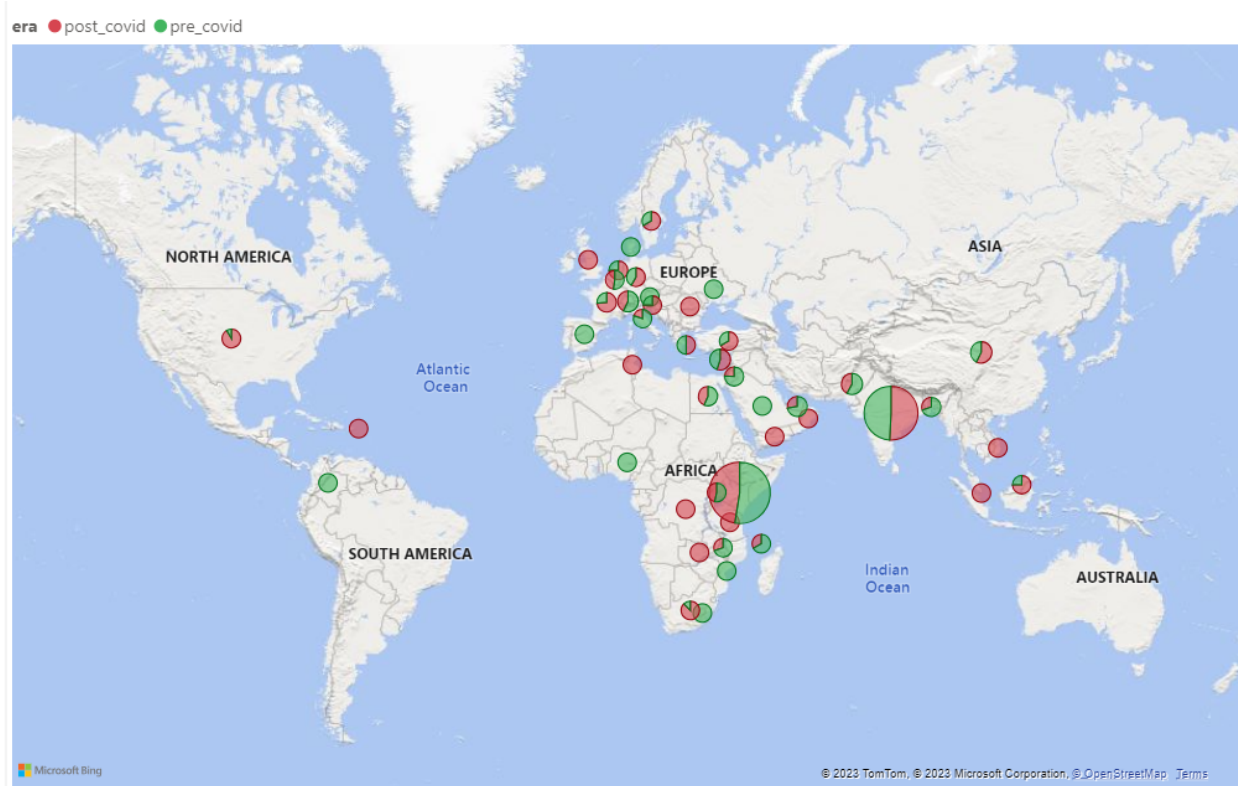

158

159 **Figure 1: Worldwide country frequency of importations pre-and post-COVID-19**  
160 **pandemic. The size of the bubble signifies the frequency contributed by the respective**  
161 **country.**

162 The oral and parenteral dosage forms contributed 151.18 (96.93%) and 3.33 (3.075%) of the  
163 DIDs, respectively (Figure 2). The contribution of individual dosage forms indicates that  
164 capsules contributed the most (Supplementary Figure 1) and Supplementary Table 1.

165

166

167

168

169

170

171

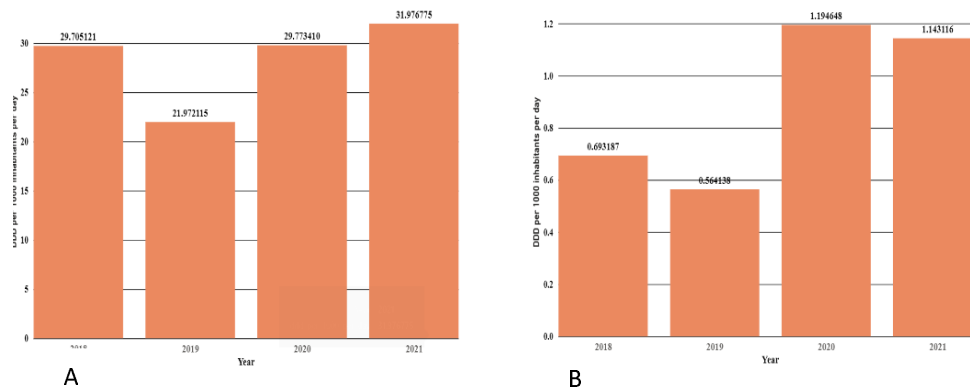

172 **Figure 2: DID contribution for oral (Panel A) and parenteral (panel B) antibiotics**

173 Overall, the Access group had the highest DDI at 82.9, followed by Watch, other, and Reserve.

174 Access group accounted for 70.8% (Figure 3) of DDI, while the WHO suggests > 60%. The

175 increase in the Watch group of antibiotics parallels a general decline in the Access group (Figure

176 3) and (Supplementary Figure 2).

177

178

179

180

181

182

183

184

185

186

187

188

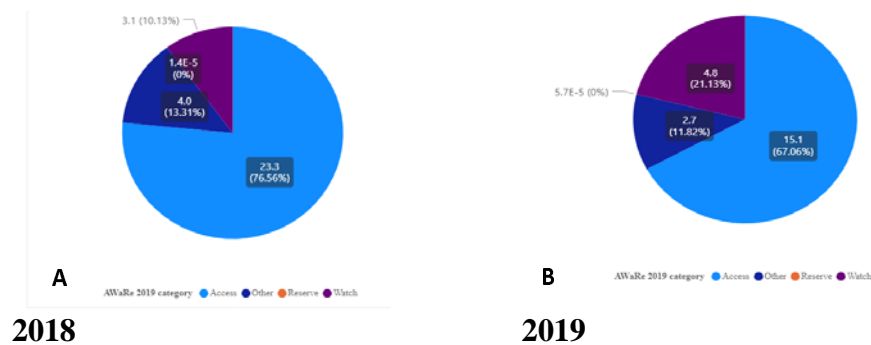

C

D

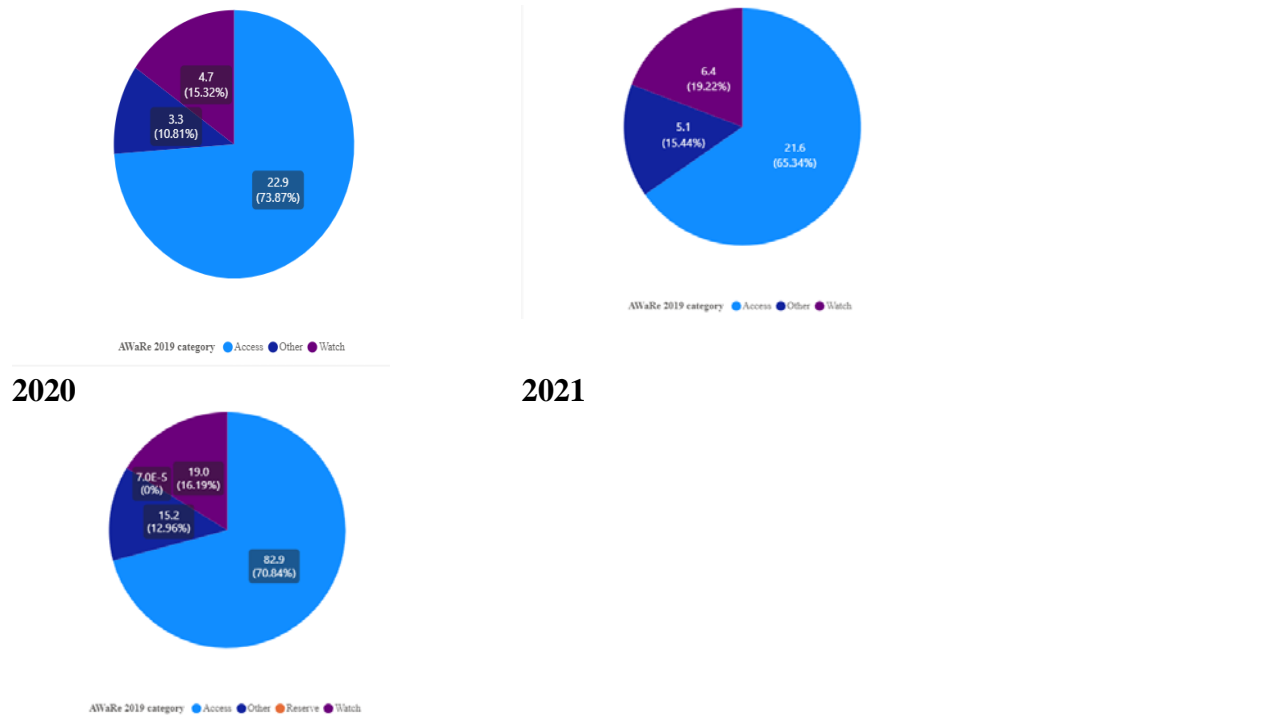

### Overall (2018-2021)

189 **Figure 3: DID contribution per WHO AWaRe classification of antibiotics consumption from**  
190 **2018-2021 (Panel A-D) and overall for four years (panel E)**

191  
192 The consumption of antibiotics was typically dominated by the Watch class (Supplementary  
193 Figure 2).

194 Using a paired samples t-test, the mean (M) and standard deviation (SD) of antibiotics  
195 consumption in the pre-COVID period (M = 1.018, SD = 3.311) was significantly different from  
196 the post-COVID period (M = 1.232, SD = 3.796),  $t(51) = -2.513$ ,  $p\text{-value} = 0.015$  and paired  
197 sample correlation of 0.994 with effect size, as measured by Cohen's  $d$ , being 0.312.

198 Overall, there was a 21% increase in the utilisation of antibiotics post-COVID-19. Azithromycin  
199 (J01FA10) increased by 163% during the pandemic (Table 2) and Supplementary Table 2.

200 **Table 2: Percentage changes in consumption during COVID-19 for top 20 consumed**  
201 **antibiotics aggregated per level 5 WHO ATC classification in DID**

DID

| <b>Antibiotic (ATC Classification level 5)</b> | <b>Pre-COVID</b> | <b>Post-COVID</b> | <b>Total</b> | <b>% change</b> |
|------------------------------------------------|------------------|-------------------|--------------|-----------------|
| Sulfamethoxazole + Trimethoprim (J01EE01)      | 21.90206         | 24.134214         | 46.036274    | 10.2            |
| Amoxicillin (J01CA04)                          | 8.958047         | 12.109729         | 21.067776    | 35.2            |
| Ampicillin + Cloxacillin (J01CR50)             | 4.957764         | 6.056899          | 11.014663    | 22.2            |
| Ciprofloxacin (J01MA02)                        | 3.320329         | 3.875245          | 7.195574     | 16.7            |
| Metronidazole (J01XD01)                        | 2.550591         | 3.007772          | 5.558363     | 17.9            |
| Azithromycin (J01FA10)                         | 1.163502         | 3.063967          | 4.227469     | 163.3           |
| Phenoxyethyl Penicillin (J01CE02)              | 1.839013         | 2.112984          | 3.951997     | 14.9            |
| Erythromycin (J01FA01)                         | 1.103971         | 1.837235          | 2.941206     | 66.4            |
| Tinidazole (J01XD02)                           | 0.988315         | 1.399698          | 2.388013     | 41.6            |
| Amoxicillin + Clavulanate (J01CR02)            | 0.81814          | 1.280495          | 2.098635     | 56.5            |
| Ceftriaxone (J01DD04)                          | 0.912814         | 1.147269          | 2.060083     | 25.7            |
| Cefalexin (J01DB01)                            | 0.956694         | 0.637602          | 1.594296     | -33.4           |
| Norfloxacin (J01MA06)                          | 0.929865         | 0.582542          | 1.512407     | -37.4           |
| Ampicillin (J01CA01)                           | 0.737038         | 0.699213          | 1.436251     | -5.1            |
| Gentamycin (J01GB03)                           | 0.184052         | 0.560144          | 0.744196     | 204.3           |
| Amoxicillin + Flucloxacillin (J01CR50)         | 0.1963           | 0.216417          | 0.412717     | 10.2            |
| Ciprofloxacin + Tinidazole (J01RA11)           | 0.219978         | 0.157204          | 0.377182     | -28.5           |
| Nitrofurantoin (J01XE01)                       | 0.220675         | 0.152053          | 0.372728     | -31.1           |
| Tetracycline (J01AA07)                         | 0.09207          | 0.222064          | 0.314134     | 141.2           |
| Chloramphenicol (J01BA01)                      | 0.210731         | 0.074664          | 0.285395     | -64.6           |

202

203 Considering level 3 of the ATC classification, we noted that antibiotics consumption varies by  
204 specific categories. Notably, beta-lactam antibacterials and penicillins (J01C) registered a  
205 significant 28.32% increase in consumption. A 4.96 DID increase between post-covid and pre-  
206 covid was noted for the beta-lactam antibacterials (Figure 4) and (Supplementary Table 3).

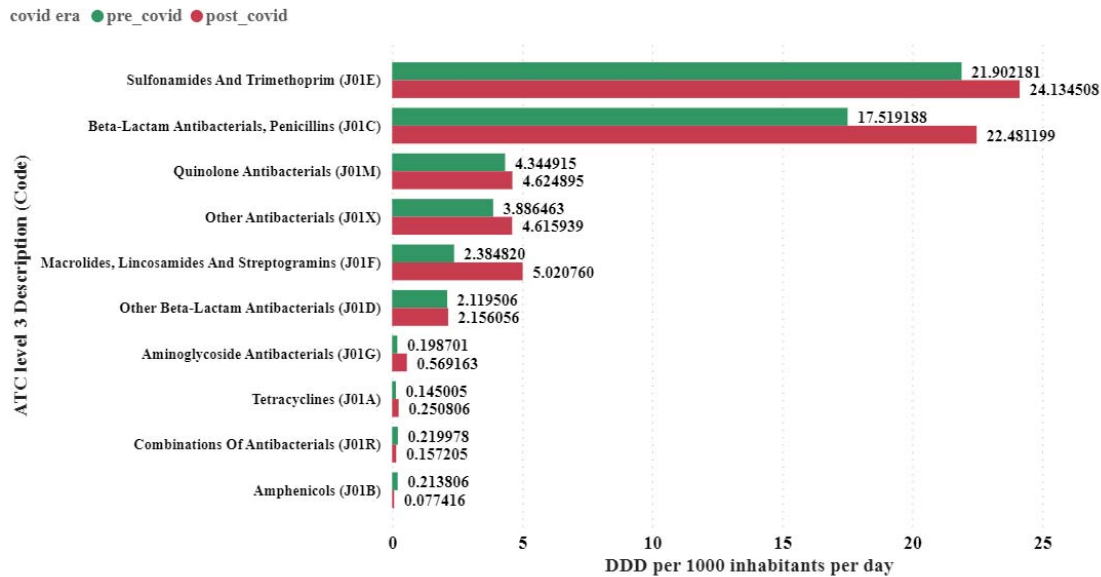

207

208 **Figure 4: Contribution of each class (level 3 ATC classification) of antibiotics utilised in**  
209 **Tanzania from 2018 to 2021**

210 On the other hand, aminoglycoside antibacterials (J01G) exhibited a remarkable 186.44%  
211 increase. In contrast, amphenicols (J01B) experienced a substantial decrease  $-(63.79\%)$ . The  
212 class of macrolides, lincosamides and streptogramins (J01F) flagged a remarkable increase of  
213 110.53% in consumption (Supplementary Table 3). In addition, annual trends of antibiotics at  
214 class 3 of the ATC classification were observed (Supplementary Table 4). Similar trends are  
215 indicated when considering level 4 ATC classification (Supplementary Table 5). It was noted  
216 that the level 3 ATC class of sulfonamides and trimethoprim (J01E) comprised 20.62% of all  
217 DID utilised, with the highest totals in pre- and post-COVID eras (Supplementary Table 4).

218 Overall, the consumption did not follow a linear pattern when fitting a linear curve (Figure 5A).

219 In addition, the autoregressive integrated moving average (ARIMA) (0, 1, 0) model (Figure 5B)  
220 predicts a significant increase in utilisation and forecasts the trends of antibiotics up to the period  
221 2027 modelled using the utilisation trend between 2018 and 2021.

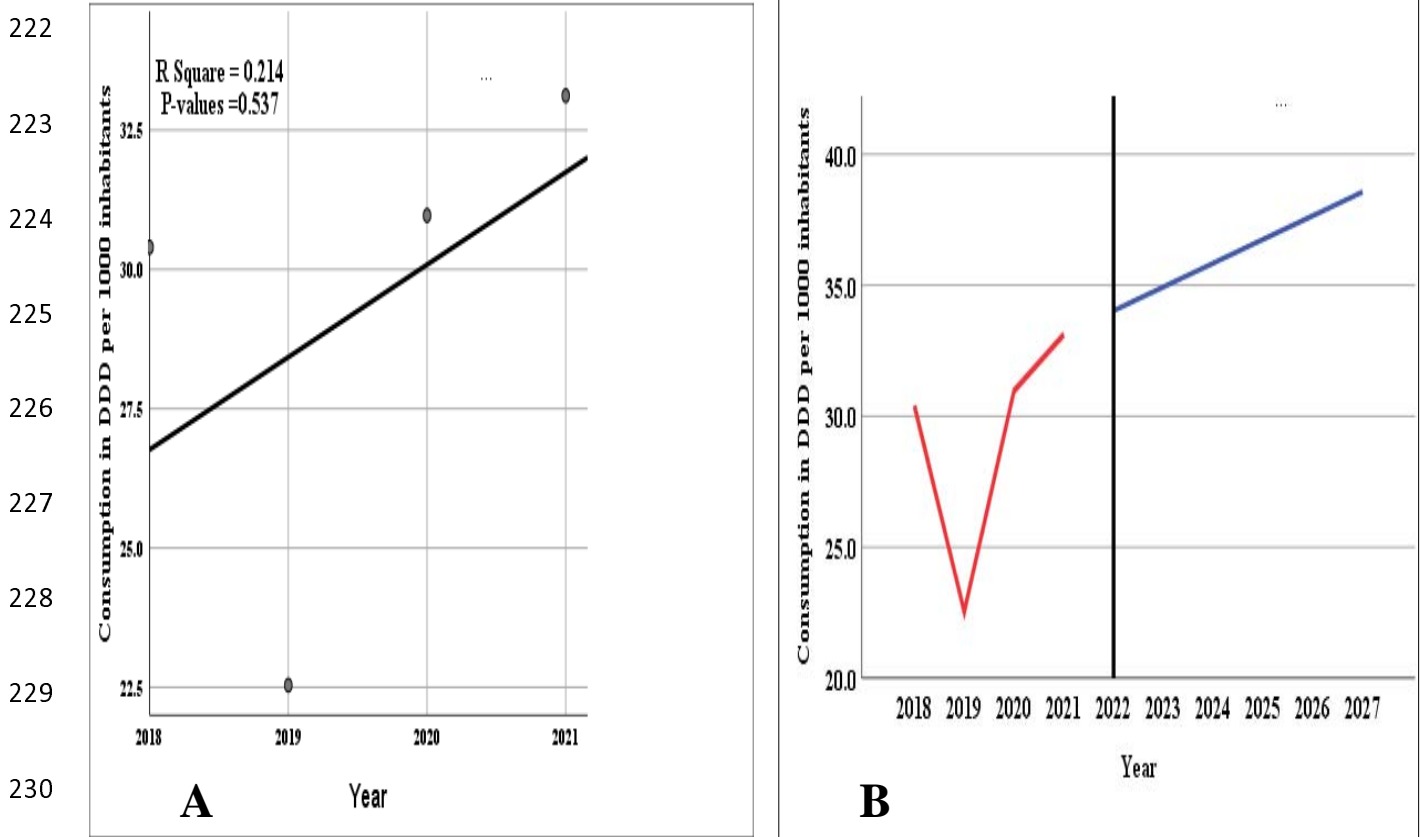

231 *Figure 5: A) Linear curve estimation showing trends of total consumed antibiotics over four*  
232 *years from 2018 to 2021 B) ARIMA model prediction of consumption from 2018 through*  
233 *2027.*

234 The model estimates that by 2022 and 2027, the DID will reach 34.03 and 38.56 DIDs,  
235 respectively.

236 The top 15 importers of these antibiotics contributed to 90.06% of all DIDs, with the Medical  
237 Stores Department (MSD) leading by contributing 20.27% (Figure 6) and (Supplementary Table  
238 6).

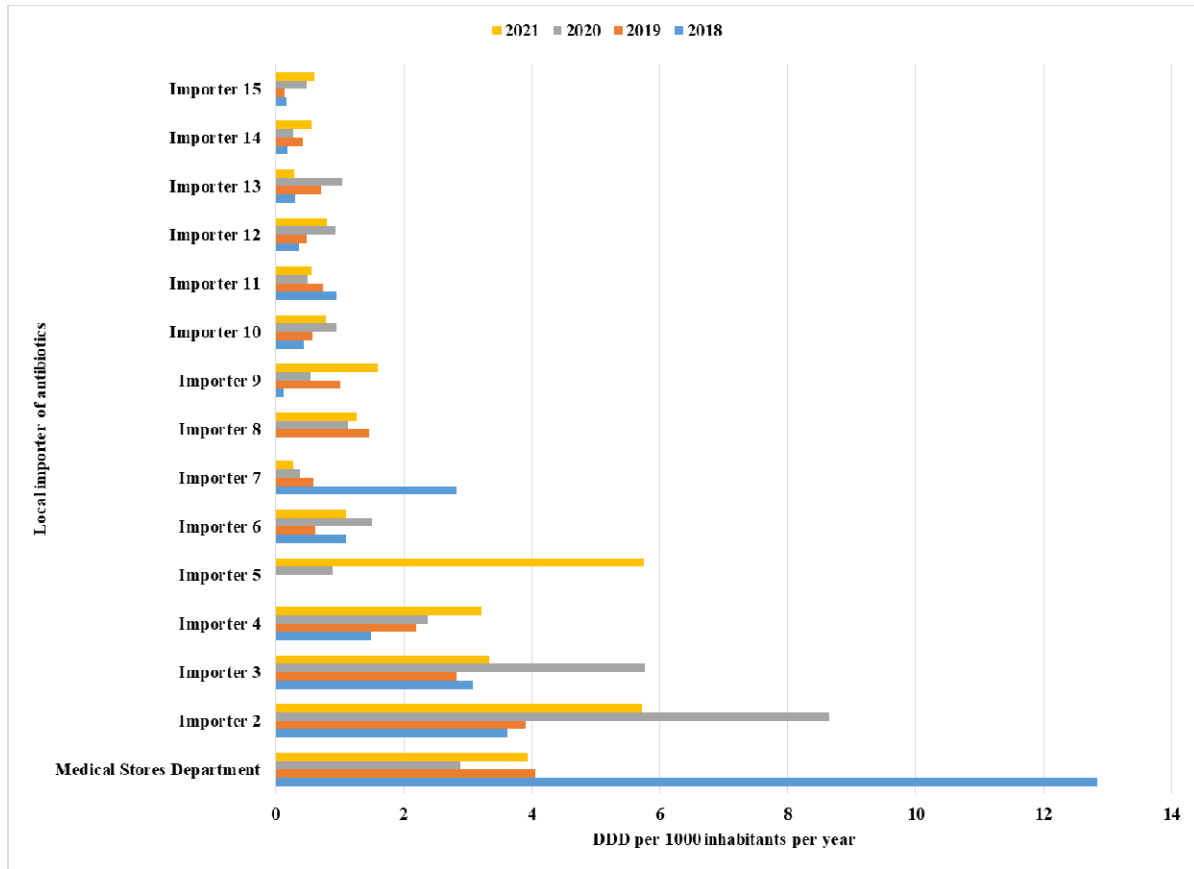

239

240 **Figure 6. Top 15 local importers of antibiotics utilised in Tanzania between 2018 and 2021.**

241

242 Regarding suppliers, the top 15 contributed 70.78% of the DID of antibiotics in Tanzania (Figure  
243 7) and (Supplementary Table 7). The suppliers were from China, India and Kenya, consistent  
244 with the map distribution (Figure 1).

245

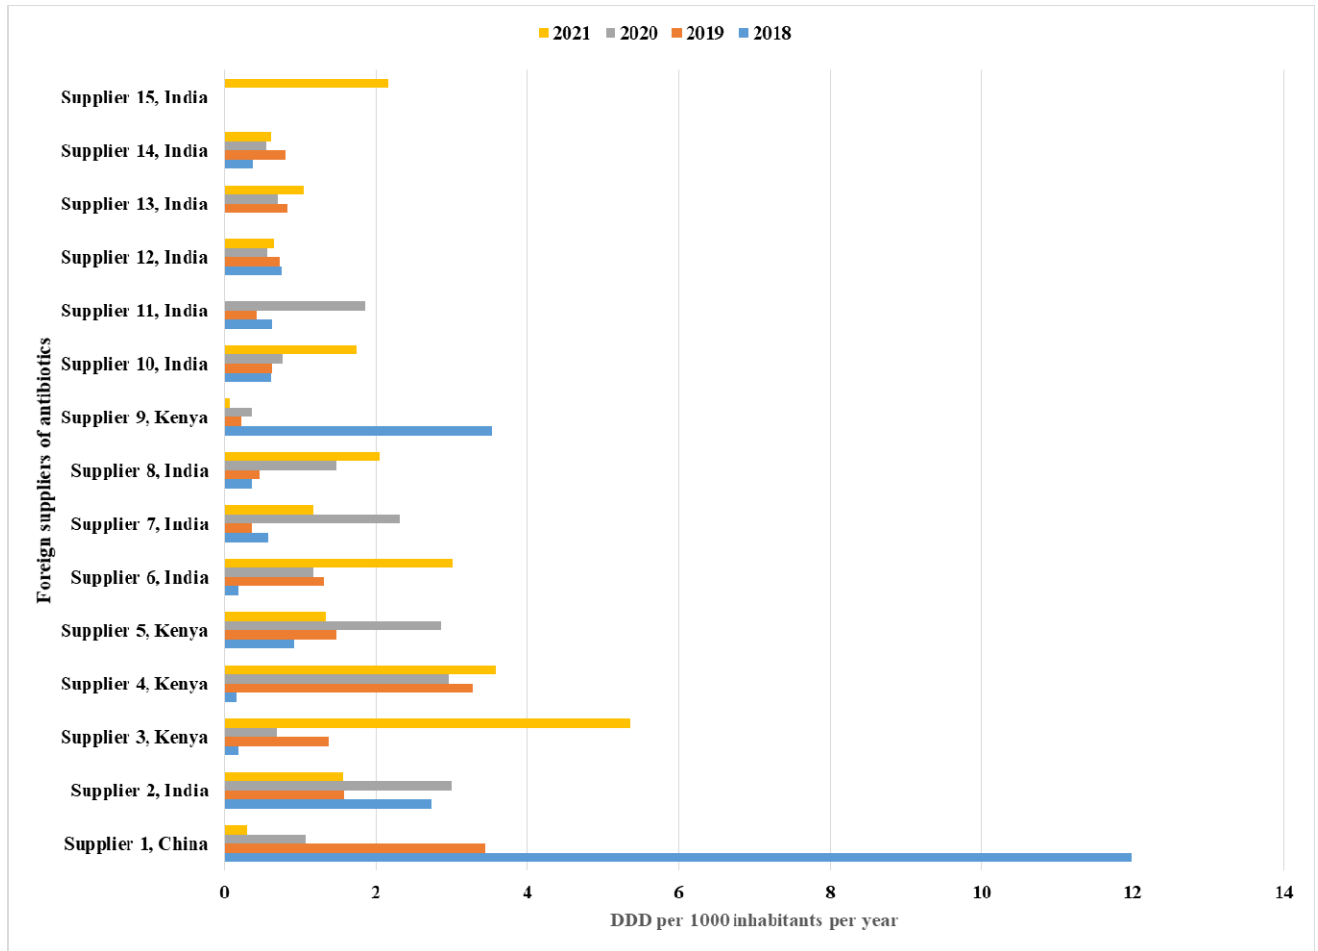

246

247 *Figure 7: Top 15 foreign suppliers of antibiotics utilised in Tanzania between 2018 and 2021.*

248

## 249 Discussion

250 The Global Action Plan for Antimicrobial Resistance aims to address the mounting challenge of  
251 increasing antimicrobial resistance (AMR) through the surveillance of antimicrobial use (AMU)  
252 and the development of antimicrobial stewardship (AMS) programs. Consequently, in Tanzania,  
253 AMS was introduced through the NAP on AMR<sup>16</sup> in 2017 and the second version of NAP<sup>17</sup>  
254 2023-2028 focuses on monitoring AMU in humans and animals.<sup>15</sup>



255 In this study, we observed an annual increase in the total consumption of antibiotics, reaching  
256 117.02 DDI over four years. The consumption was 64.09 DDI in the post-COVID era and 52.93  
257 DDI in the pre-COVID era. Nevertheless, the mean is 29.25 ( $\pm 4.01$ ) compared to the mean of  
258 22.07 ( $\pm 48.85$ ) DDI in 2010 to 2016 consumption data in Tanzania<sup>15</sup>.

259 A paired samples t-test indicated a significant difference in means 1.018 vs. = 1.232 in pre and  
260 post-COVID periods, respectively, with p-value = 0.015 and paired sample correlation of 0.994.  
261 This result suggests a statistically significant increase in antibiotics consumption during the  
262 pandemic. The effect size, as measured by Cohen's d, was 0.312, suggesting a small but  
263 practically significant increase. The high correlation between pre-COVID and post-COVID  
264 consumption ( $r = 0.994$ ) reinforces the reliability of these findings, suggesting that the COVID-  
265 19 pandemic had a notable impact on antibiotics consumption in Tanzania.

266 The combined usage of all antibiotics increased by 21.1% from the pre-COVID period to the  
267 post-COVID period. An increase was noted for gentamycin (J01GB03) at +204.3%, followed by  
268 azithromycin (J01FA10) at +163.3% and tetracycline (J01AA07) at +141.2%. A decrease was  
269 observed in chloramphenicol (J01BA01) (-64.6%), norfloxacin (J01MA06) (-37.4%), and  
270 nitrofurantoin (J01XE01) (-31.1%). A % increase in azithromycin was noted in other studies in  
271 LMICS and HICs.<sup>19</sup> A study in Croatia showed that azithromycin distribution increased from  
272 1.76 in 2017 to 2.01 Days of Therapy (DOTS) units/1000 inhabitant-days in 2017–2020,  
273 indicating azithromycin overuse.<sup>20</sup> Other reports during the pandemic showed that azithromycin  
274 consumption increased up to 3 times compared to the pre-COVID period.<sup>19–21</sup>

275 Interestingly, the popularity of azithromycin emerged from reports of its antiviral activity and  
276 also from early pandemic reports of screening indicating potential activity for SARS-CoV-2  
277 alone or in combination with hydroxychloroquine.<sup>22</sup> Later, several randomised clinical trials

278 (RCTs) suggested that azithromycin does not reduce hospital admissions, respiratory failure, or  
279 death when compared to conventional therapy, and therefore, azithromycin should no longer be  
280 used to treat COVID-19.<sup>23-28</sup>

281 Several studies have revealed a significant increase in resistance to azithromycin in some strains  
282 of *Neisseria gonorrhoeae*.<sup>22,29</sup> Antibiotic resistance against azithromycin also increased in *E.*  
283 *coli*<sup>30</sup> and *Streptococcus pneumoniae*.<sup>31</sup> Therefore, continued use of azithromycin should have  
284 been limited to infections for which azithromycin is recommended rather than COVID-19.<sup>22</sup>

285 Examining the consumption at level 3 of ATC classification, we noted a remarkable increase  
286 during the post-COVID-19 era of beta-lactam antibacterials, which penicillins (J01C) and  
287 aminoglycoside antibacterials (J01G) exhibited. At the same time, amphenicols (J01B)  
288 experienced a substantial decrease up to -63.79%. The use of macrolides, lincosamides and  
289 streptogramins (J01F) also increased remarkably by 110.53%. This finding underscores the  
290 specific impact of the pandemic on the consumption of these antibiotics; the major contributor to  
291 this increase was azithromycin.

292 The overall consumption of antibiotics increased from 52.935 DID (pre-COVID) to 64.088 DID  
293 (post-COVID), with a total change of 21.07%.

294 Overall, the ATC level 3 class of sulfonamides and trimethoprim (J01E) ranked the top  
295 consumed group with only 10.19% increase in consumption, suggesting continued reliance on  
296 this class of antibiotics during the pandemic. This could be due to their effectiveness against  
297 certain infections and wide availability, especially for HIV/AIDS patients. This is usually  
298 indicated by the higher contribution of Sulfamethoxazole + Trimethoprim (J01EE01) used in the  
299 HIV program.

300 For tetracycline (level 3 class J01A), there was a moderate consumption increase from 0.145 DID  
301 (pre-COVID) to 0.251 DID (post-COVID), a 72.96% increase, even though this class ranked  
302 lower compared to previous studies in Tanzania where the class was among the top contributors  
303 of consumed antibiotics.<sup>15</sup> It is important to note that the percentage change in usage should be  
304 taken with caution since it is calculated based on a relatively small difference in values, and the  
305 absolute values of DID for each antibiotic may vary significantly.

306 A recent study conducted in Cameroon during the COVID-19 pandemic revealed that antibiotics  
307 were highly overused and misused, leading to increased AMR.<sup>32</sup>

308 This study is one of the few conducted in sub-Saharan Africa to estimate antibiotics utilisation at  
309 the national level. The data indicate an increase in the consumption of antibiotics during the  
310 pandemic, with a mean of 29.25 DIDs utilised in Tanzania between 2018 and 2021. This average  
311 was less than that studied between 2010 and 2016 in Tanzania, where the mean was 57.4 DIDs  
312 over seven years. The study conducted in Tanzania from 2017 to 2019 also reported a slightly  
313 higher average compared to this study.<sup>33</sup>

314 These results highlight the importance of expanding the monitoring of AMU and implementing  
315 AMS programs to address the issue of AMR, especially during global health crises such as the  
316 COVID-19 pandemic. The observed changes in antibiotic consumption highlight the need for  
317 continued monitoring and the development of interventions to ensure the rational use of  
318 antibiotics since the increase in overall consumption may contribute to AMR. Antibiotic  
319 stewardship programs must be emphasised post-COVID in the healthcare landscape.

320 The ARIMA forecasted that antibiotics consumption would increase between 2022 and 2027 to  
321 reach 34.03 and 38.56 DIDs, respectively. This value is less than the value predicted with the

322 data from 2010–2016 which estimated that by 2022, the total of antibiotics consumed would  
323 reach 89.60 DIDs.<sup>15</sup> This may reflect the impact of AMS under the NAP implementation.<sup>16,34,35</sup>

### 324 **Limitations of the study**

325 This study has some limitations. First, it relies on data from importation records of NMRA,  
326 potentially subject to variability and errors, which could impact the accuracy of the results. The  
327 data does not account for imported antibiotics that had expired or were re-exported to  
328 neighbouring countries. These records also exclude efforts by manufacturers that produced some  
329 antibiotics locally during the pandemic. Second, while it explores the association between the  
330 pandemic and antibiotic consumption, it does not establish causality, as other unaccounted  
331 factors may influence consumption trends. Third, the study's aggregated data may not capture  
332 regional variations, which is important for understanding local healthcare practices and policies.  
333 Additionally, the analysis's specific timeframe during the pandemic may not account for  
334 evolving healthcare practices and AMS interventions, and the study does not delve into the  
335 underlying factors driving these trends. Further research is warranted to understand the factors  
336 driving these consumption trends and their potential impact on public health. Results need to be  
337 interpreted with these limitations in mind.

### 338 **Conclusion**

339 This study highlights an increase in the consumption of antibiotics during the COVID-19  
340 pandemic, indicating that the COVID-19 pandemic impacted the rise in antibiotics consumption  
341 in Tanzania.

342 **Recommendations**

343 The surge in AMU post-COVID-19 calls for continuous monitoring and interventions to promote  
344 rational use of antibiotics to combat AMR through AMS and ensure long-term effectiveness in  
345 managing infectious diseases. In addition, more studies using data from community pharmacies  
346 and hospitals are needed for a more accurate representation of patient antibiotic consumption.

347 **Availability of Data and Materials**

348 All data are included in this article.

349 **Acknowledgement**

350 We thank the Tanzania Medicines and Medical Devices Authority (TMDA) staff for providing  
351 the importation data.

352 **Funding**

353 This work did not receive any specific funding.

354 **Transparency declarations**

355 None to declare

356 **Supplementary data**

357 Figures and Tables are available as Supplementary data at JAC-AMR Online.

358 **References**

- 359 1. Murray CJL, Ikuta KS, Sharara F, *et al.* Global burden of bacterial antimicrobial resistance in  
360 2019: a systematic analysis. *Lancet* 2022; **399**: 629–55. Available at:  
361 <https://linkinghub.elsevier.com/retrieve/pii/S0140673621027240>.  
362 2. Otaigbe II, Elikwu CJ. Drivers of inappropriate antibiotic use in low- and middle-income

- 363 countries. *JAC-Antimicrobial Resist* 2023; **5**. Available at:  
364 <https://academic.oup.com/jacamr/article/doi/10.1093/jacamr/dlad062/7187015>.
- 365 3. Browne AJ, Chipeta MG, Haines-Woodhouse G, *et al.* Global antibiotic consumption and  
366 usage in humans, 2000–18: a spatial modelling study. *Lancet Planet Heal* 2021; **5**: e893–904.  
367 Available at: <https://linkinghub.elsevier.com/retrieve/pii/S2542519621002801>.
- 368 4. Powell-Jackson T, King JJC, Makungu C, *et al.* Infection prevention and control compliance  
369 in Tanzanian outpatient facilities: a cross-sectional study with implications for the control of  
370 COVID-19. *Lancet Glob Heal* 2020; **8**: e780–9. Available at:  
371 <https://linkinghub.elsevier.com/retrieve/pii/S2214109X20302229>.
- 372 5. Kigume R, Maluka S. The failure of community-based health insurance schemes in Tanzania:  
373 opening the black box of the implementation process. *BMC Health Serv Res* 2021; **21**: 646.  
374 Available at: <https://bmchealthservres.biomedcentral.com/articles/10.1186/s12913-021-06643-6>.
- 375 6. Zanichelli V, Sharland M, Cappello B, *et al.* The WHO AWaRe (Access, Watch, Reserve)  
376 antibiotic book and prevention of antimicrobial resistance. *Bull World Health Organ* 2023; **101**:  
377 290–6. Available at:  
378 <https://www.ncbi.nlm.nih.gov/pmc/articles/PMC10042089/pdf/BLT.22.288614.pdf>.
- 379 7. WHO. 2021 AWaRe classification. Available at:  
380 <https://www.who.int/publications/i/item/2021-aware-classification>. Accessed October 9, 2023.
- 381 8. WHO. The WHO AWaRe (Access, Watch, Reserve) antibiotic book. Available at:  
382 <https://www.who.int/publications/i/item/9789240062382>. Accessed October 9, 2023.
- 383 9. Hamim H, Sangeda RZ, Bundala M, *et al.* Utilisation Trends of Antiviral and Antifungal

- 384 Agents for Human Systemic Use in Tanzania From 2010 to 2017 Using the World Health  
385 Organization Collaborating Centre for Drug Statistics Methodology. *Front Trop Dis* 2021; **2**: 30.  
386 Available at: <https://www.frontiersin.org/articles/10.3389/fitd.2021.723991/full>. Accessed  
387 November 27, 2021.
- 388 10. Mugabe PA, Renkamp TM, Rybak C, *et al.* Governing COVID-19: analysing the effects of  
389 policy responses on food systems in Tanzania. *Agric Food Secur* 2022; **11**: 47. Available at:  
390 <https://agricultureandfoodsecurity.biomedcentral.com/articles/10.1186/s40066-022-00383-4>.
- 391 11. Tarimo CS, Wu J. The first confirmed case of COVID-19 in Tanzania: recommendations  
392 based on lesson learned from China. *Trop Med Health* 2020; **48**: 25. Available at:  
393 <https://tropmedhealth.biomedcentral.com/articles/10.1186/s41182-020-00214-x>.
- 394 12. Mfinanga SG, Mnyambwa NP, Minja DT, *et al.* Tanzania's position on the COVID-19  
395 pandemic. *Lancet* 2021; **397**: 1542–3. Available at:  
396 <https://linkinghub.elsevier.com/retrieve/pii/S0140673621006784>.
- 397 13. Mboya EA, Ndumwa HP, Amani DE, *et al.* Critical illness at the emergency department of a  
398 Tanzanian national hospital in a three-year period 2019–2021. *BMC Emerg Med* 2023; **23**: 86.  
399 Available at: <https://bmcemergmed.biomedcentral.com/articles/10.1186/s12873-023-00858-y>.
- 400 14. Simões AS, Maia MR, Gregório J, *et al.* Participatory implementation of an antibiotic  
401 stewardship programme supported by an innovative surveillance and clinical decision-support  
402 system. *J Hosp Infect* 2018; **100**: 257–64. Available at:  
403 <https://linkinghub.elsevier.com/retrieve/pii/S0195670118303992>.
- 404 15. Sangeda RZ, Saburi HA, Masatu FC, *et al.* National Antibiotics Utilisation Trends for  
405 Human Use in Tanzania from 2010 to 2016 Inferred from Tanzania Medicines and Medical

- 406 Devices Authority Importation Data. *Antibiotics* 2021; **10**: 1249. Available at:  
407 <https://www.mdpi.com/2079-6382/10/10/1249>.
- 408 16. Sangeda RZ, Kibona J, Munishi C, *et al.* Assessment of Implementation of Antimicrobial  
409 Resistance Surveillance and Antimicrobial Stewardship Programs in Tanzanian Health Facilities  
410 a Year After Launch of the National Action Plan. *Front Public Heal* 2020; **8**: 454. Available at:  
411 <https://www.frontiersin.org/article/10.3389/fpubh.2020.00454/full>. Accessed August 4, 2020.
- 412 17. World Health Organization. United Republic of Tanzania: Second national action plan on  
413 antimicrobial resistance 2023-2028. Available at:  
414 [https://www.who.int/publications/m/item/united-republic-of-tanzania-second-national-action-](https://www.who.int/publications/m/item/united-republic-of-tanzania-second-national-action-plan-on-antimicrobial-resistance)  
415 [plan-on-antimicrobial-resistance](https://www.who.int/publications/m/item/united-republic-of-tanzania-second-national-action-plan-on-antimicrobial-resistance). Accessed September 20, 2023.
- 416 18. Hutchinson JM, Patrick DM, Marra F, *et al.* Measurement of Antibiotic Consumption: A  
417 Practical Guide to the Use of the Anatomical Therapeutic Chemical Classification and Defined  
418 Daily Dose System Methodology in Canada. *Can J Infect Dis* 2004; **15**: 29–35. Available at:  
419 <http://www.hindawi.com/journals/cjidmm/2004/389092/abs/>. Accessed August 18, 2017.
- 420 19. Gouin KA, Creasy S, Beckerson M, *et al.* Trends in Prescribing of Antibiotics and Drugs  
421 Investigated for Coronavirus Disease 2019 (COVID-19) Treatment in US Nursing Home  
422 Residents During the COVID-19 Pandemic. *Clin Infect Dis* 2022; **74**: 74–82. Available at:  
423 <https://academic.oup.com/cid/article/74/1/74/6167836>.
- 424 20. Bogdanić N, Močibob L, Vidović T, Soldo A, Begovać J. Azithromycin consumption during  
425 the COVID-19 pandemic in Croatia, 2020 Karunasagar I, ed. *PLoS One* 2022; **17**: e0263437.  
426 Available at: <https://dx.plos.org/10.1371/journal.pone.0263437>.
- 427 21. Stoichitoiu LE, Pinte L, Ceasovschih A, *et al.* In-Hospital Antibiotic Use for COVID-19:



- 428 Facts and Rationales Assessed through a Mixed-Methods Study. *J Clin Med* 2022; **11**: 3194.  
429 Available at: <https://www.mdpi.com/2077-0383/11/11/3194>.
- 430 22. Kournoutou GG, Dinos G. Azithromycin through the Lens of the COVID-19 Treatment.  
431 *Antibiotics* 2022; **11**: 1063. Available at: <https://www.mdpi.com/2079-6382/11/8/1063>.
- 432 23. Oldenburg CE, Pinsky BA, Brogdon J, *et al.* Effect of Oral Azithromycin vs Placebo on  
433 COVID-19 Symptoms in Outpatients With SARS-CoV-2 Infection. *JAMA* 2021; **326**: 490.  
434 Available at: <https://jamanetwork.com/journals/jama/fullarticle/2782166>.
- 435 24. Butler CC, Dorward J, Yu L-M, *et al.* Azithromycin for community treatment of suspected  
436 COVID-19 in people at increased risk of an adverse clinical course in the UK (PRINCIPLE): a  
437 randomised, controlled, open-label, adaptive platform trial. *Lancet* 2021; **397**: 1063–74.  
438 Available at: <https://linkinghub.elsevier.com/retrieve/pii/S014067362100461X>.
- 439 25. Hinks TSC, Barber VS, Black J, *et al.* A multi-centre open-label two-arm randomised  
440 superiority clinical trial of azithromycin versus usual care in ambulatory COVID-19: study  
441 protocol for the ATOMIC2 trial. *Trials* 2020; **21**: 718. Available at:  
442 <https://trialsjournal.biomedcentral.com/articles/10.1186/s13063-020-04593-8>.
- 443 26. RECOVERY Collaborative Group. Tocilizumab in patients admitted to hospital with  
444 COVID-19 (RECOVERY): a randomised, controlled, open-label, platform trial. *Lancet (London, England)* 2021; **397**: 1637–45. Available at: <http://www.ncbi.nlm.nih.gov/pubmed/33933206>.
- 445  
446 27. Gyselinck I, Janssens W, Verhamme P, Vos R. Rationale for azithromycin in COVID-19: an  
447 overview of existing evidence. *BMJ Open Respir Res* 2021; **8**: e000806. Available at:  
448 <https://bmjopenrespres.bmj.com/lookup/doi/10.1136/bmjresp-2020-000806>.

- 449 28. Furtado RHM, Berwanger O, Fonseca HA, *et al.* Azithromycin in addition to standard of care  
450 versus standard of care alone in the treatment of patients admitted to the hospital with severe  
451 COVID-19 in Brazil (COALITION II): a randomised clinical trial. *Lancet* 2020; **396**: 959–67.  
452 Available at: <https://linkinghub.elsevier.com/retrieve/pii/S0140673620318626>.
- 453 29. Belkacem A, Jacquier H, Goubard A, *et al.* Molecular epidemiology and mechanisms of  
454 resistance of azithromycin-resistant *Neisseria gonorrhoeae* isolated in France during 2013–14. *J*  
455 *Antimicrob Chemother* 2016; **71**: 2471–8. Available at: [https://academic.oup.com/jac/article-](https://academic.oup.com/jac/article-lookup/doi/10.1093/jac/dkw182)  
456 [lookup/doi/10.1093/jac/dkw182](https://academic.oup.com/jac/article-lookup/doi/10.1093/jac/dkw182).
- 457 30. Gomes C, Ruiz-Roldán L, Mateu J, Ochoa TJ, Ruiz J. Azithromycin resistance levels and  
458 mechanisms in *Escherichia coli*. *Sci Rep* 2019; **9**: 6089. Available at:  
459 <https://www.nature.com/articles/s41598-019-42423-3>.
- 460 31. Hart JD, Samikwa L, Meleke H, *et al.* Prevalence of nasopharyngeal *Streptococcus*  
461 *pneumoniae* carriage and resistance to macrolides in the setting of azithromycin mass drug  
462 administration: analysis from a cluster-randomised controlled trial in Malawi, 2015–17. *The*  
463 *Lancet Microbe* 2022; **3**: e142–50. Available at:  
464 <https://linkinghub.elsevier.com/retrieve/pii/S2666524721002792>.
- 465 32. Djuikoue CI, Yamdeu Djonkhou W, Epie Bekolo C, *et al.* Prevalence and Antibiotic  
466 Resistance Pattern of *Streptococcus*, *Staphylococcus*, *Neisseria meningitidis* and  
467 *Enterobacteriaceae* in Two Reference Hospitals of Yaoundé: An Overview before and during  
468 COVID-19 Pandemic Era. *Antibiotics* 2023; **12**: 929. Available at: [https://www.mdpi.com/2079-](https://www.mdpi.com/2079-6382/12/5/929)  
469 [6382/12/5/929](https://www.mdpi.com/2079-6382/12/5/929).
- 470 33. Mbwasi R, Mapunjo S, Wittenauer R, *et al.* National Consumption of Antimicrobials in

471 Tanzania  $\square$ : 2017 – 2019. 2020; **11**: 2017–9.

472 34. Frumence G, Mboera LEG, Sindato C, *et al.* The Governance and Implementation of the  
473 National Action Plan on Antimicrobial Resistance in Tanzania: A Qualitative Study. *Antibiotics*  
474 2021; **10**: 273. Available at: <https://www.mdpi.com/2079-6382/10/3/273>.

475 35. Nkinda L, Mwakawanga DL, Kibwana UO, *et al.* Implementation of antibiotic stewardship  
476 programmes in paediatric patients in regional referral hospitals in Tanzania: experience from  
477 prescribers and dispensers. *JAC-Antimicrobial Resist* 2022; **4**: dlac118. Available at:  
478 <http://www.ncbi.nlm.nih.gov/pubmed/36439992>.

479

480

481 **Supplementary Figures and Tables**

482 **Antibiotic Utilisation Patterns in Tanzania: A Retrospective Longitudinal Study**

483 **Comparing Pre- and Post-COVID-19 Pandemic Using Tanzania Medicines and Medical**

484 **Devices Authority Data**

485 **Raphael Z. Sangeda<sup>1</sup>, Sahani M. William<sup>1</sup>, Faustine Cassian Masatu<sup>2</sup>, Adonis Bitegeko<sup>2</sup>,**

486 **Yonah Hebron Mwalwisi<sup>2</sup>, Emmanuel Alphonse Nkiligi<sup>2</sup>, Pius Gerald Horumpende<sup>3,4,5</sup>,**

487 **Adam M. Fimbo<sup>2</sup>**

488 <sup>1</sup>Department of Pharmaceutical Microbiology, Muhimbili University of Health and Allied  
489 Sciences, P.O. Box 65013, Dar es Salaam, Tanzania

490 <sup>2</sup>Tanzania Medicines and Medical Devices Authority, P.O. Box 1253, Dodoma, Tanzania

491 <sup>3</sup>Department of Curative Services, Ministry of Health, P.O. Box 743 Dodoma, Tanzania.

492 College, Moshi, Tanzania

493 <sup>4</sup>Kilimanjaro Clinical Research Institute (KCRI), Moshi, Tanzania

494 <sup>5</sup>Lugalo Infectious Diseases Research Centre, General Military Hospital (GMH) and Military  
495 College of Medical Sciences (MCMS), P.O. Box 4000 Dar es Salaam, Tanzania

496

497 \*Correspondence to Raphael Zozimus Sangeda email: [sangeda@gmail.com](mailto:sangeda@gmail.com)

498

499 **Short title: Influence of COVID-19 on Antibiotic Utilization Patterns in Tanzania**

500

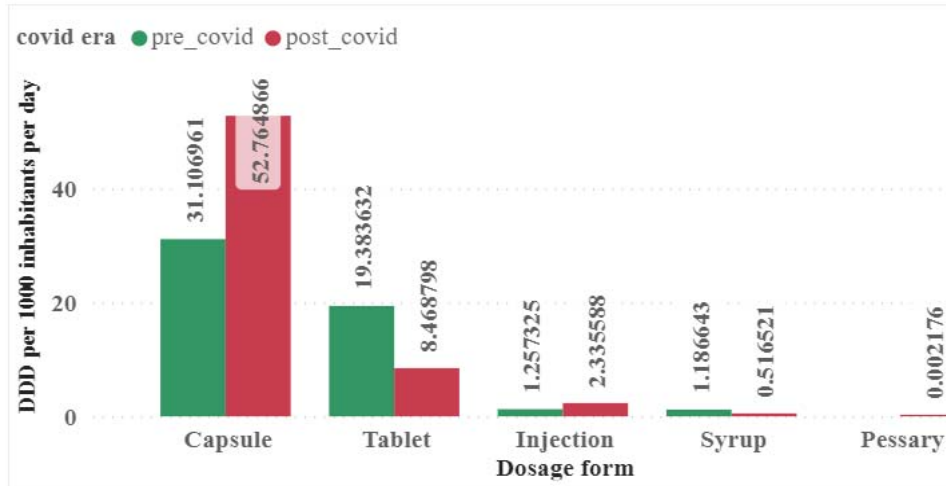

501

502 **Supplementary Figure 1: Contribution of antibiotics consumption per dosage and by**  
 503 **COVID-19 era**

504

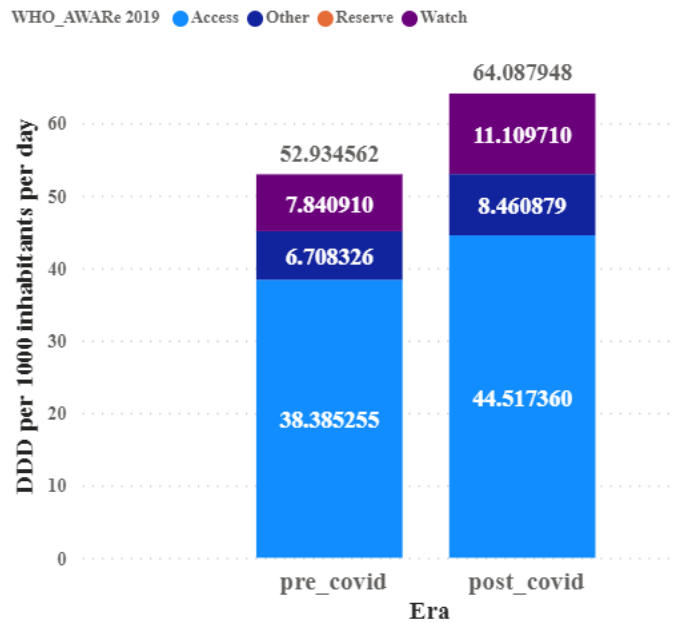

505

506 **Supplementary Figure 2: Distribution of Defined Daily Dose (DDD per 1000 inhabitants per**  
 507 **day (DID)) of antibiotics per the World Health Organization's AWaRe class for antibiotics**  
 508 **utilised in Tanzania from 2018 to 2020.**

509

510

511

512 **Supplementary Table 1: Annual contribution of consumption of antibiotics per dosage**  
 513 **form**

|                    | Year         |              | % contribution |              |                 |
|--------------------|--------------|--------------|----------------|--------------|-----------------|
|                    | 2018         | 2019         | 2020           | 2021         | All time        |
| <b>Dosage form</b> | <b>2018</b>  | <b>2019</b>  | <b>2020</b>    | <b>2021</b>  | <b>All time</b> |
| Capsules           | 52.5         | 67.2         | 84.7           | 80.2         | 71.1            |
| Injections         | 2.3          | 2.5          | 3.9            | 3.4          | 3.0             |
| Pessaries          |              |              |                | 0.0          | 0.0             |
| Syrup              | 2.7          | 1.6          | 0.7            | 0.9          | 1.5             |
| Tablets            | 42.5         | 28.7         | 10.8           | 15.5         | 24.4            |
| <b>Total</b>       | <b>100.0</b> | <b>100.0</b> | <b>100.0</b>   | <b>100.0</b> | 100.0           |

514

515

516

517

518 **Supplementary Table 2: Percentage changes in consumption during COVID-19 for top 20**  
 519 **consumed antibiotics aggregated per level 5 WHO ATC classification in DID**

| Antibiotic (ATC level 5 code)             | DID       |            |           | % Change |
|-------------------------------------------|-----------|------------|-----------|----------|
|                                           | Pre COVID | Post COVID | Total     |          |
| Sulfamethoxazole + Trimethoprim (J01EE01) | 21.90206  | 24.134214  | 46.036274 | 10.2     |
| Amoxicillin (J01CA04)                     | 8.958047  | 12.109729  | 21.067776 | 35.2     |
| Ampicillin + Cloxacillin (J01CR50)        | 4.957764  | 6.056899   | 11.014663 | 22.2     |
| Ciprofloxacin (J01MA02)                   | 3.320329  | 3.875245   | 7.195574  | 16.7     |
| Metronidazole (J01XD01)                   | 2.550591  | 3.007772   | 5.558363  | 17.9     |
| Azithromycin (J01FA10)                    | 1.163502  | 3.063967   | 4.227469  | 163.3    |
| Phenoxyethyl Penicillin (J01CE02)         | 1.839013  | 2.112984   | 3.951997  | 14.9     |
| Erythromycin (J01FA01)                    | 1.103971  | 1.837235   | 2.941206  | 66.4     |
| Tinidazole (J01XD02)                      | 0.988315  | 1.399698   | 2.388013  | 41.6     |
| Amoxicillin + Clavulanate (J01CR02)       | 0.81814   | 1.280495   | 2.098635  | 56.5     |
| Ceftriaxone (J01DD04)                     | 0.912814  | 1.147269   | 2.060083  | 25.7     |

|                                                                                   |          |          |          |        |
|-----------------------------------------------------------------------------------|----------|----------|----------|--------|
| Cefalexin (J01DB01)                                                               | 0.956694 | 0.637602 | 1.594296 | -33.4  |
| Norfloxacin (J01MA06)                                                             | 0.929865 | 0.582542 | 1.512407 | -37.4  |
| Ampicillin (J01CA01)                                                              | 0.737038 | 0.699213 | 1.436251 | -5.1   |
| Gentamycin (J01GB03)                                                              | 0.184052 | 0.560144 | 0.744196 | 204.3  |
| Amoxicillin + Flucloxacillin (J01CR50)                                            | 0.1963   | 0.216417 | 0.412717 | 10.2   |
| Ciprofloxacin + Tinidazole (J01RA11)                                              | 0.219978 | 0.157204 | 0.377182 | -28.5  |
| Nitrofurantoin (J01XE01)                                                          | 0.220675 | 0.152053 | 0.372728 | -31.1  |
| Tetracycline (J01AA07)                                                            | 0.09207  | 0.222064 | 0.314134 | 141.2  |
| Chloramphenicol (J01BA01)                                                         | 0.210731 | 0.074664 | 0.285395 | -64.6  |
| Cefixime (J01DD08)                                                                | 0.089679 | 0.18745  | 0.277129 | 109.0  |
| Clarithromycin (J01FA09)                                                          | 0.116368 | 0.116796 | 0.233164 | 0.4    |
| Ornidazole (J01XD03)                                                              | 0.124153 | 0.053845 | 0.177998 | -56.6  |
| Cefuroxime (J01DC02)                                                              | 0.073682 | 0.04626  | 0.119942 | -37.2  |
| Ofloxacin (J01MA01)                                                               | 0.052129 | 0.06318  | 0.115309 | 21.2   |
| Cefadroxil (J01DB05)                                                              | 0.041038 | 0.050992 | 0.09203  | 24.3   |
| Levofloxacin (J01MA13)                                                            | 0.008836 | 0.082444 | 0.09128  | 833.0  |
| Doxycycline (J01AA02)                                                             | 0.052935 | 0.028352 | 0.081287 | -46.4  |
| Cefotaxime (J01DD01)                                                              | 0.005643 | 0.066155 | 0.071798 | 1072.3 |
| Cefpodoxime (J01DD13)                                                             | 0.02914  | 0.006786 | 0.035926 | -76.7  |
| Moxifloxacin (J01MA15)                                                            | 0.015046 | 0.012868 | 0.027914 | -14.5  |
| Dexamethasone + Neomycin + Polymyxin B (J01GB05)                                  | 0.014225 | 0.008568 | 0.022793 | -39.8  |
| Lomefloxacin (J01MA07)                                                            | 0.010553 | 0.008616 | 0.019169 | -18.4  |
| Meropenem (J01DH02)                                                               | 0.00761  | 0.009849 | 0.017459 | 29.4   |
| Ampicillin + enzyme inhibitor (J01CA51)                                           | 0.011029 | 0.004753 | 0.015782 | -56.9  |
| Nalidixic Acid (J01MB02)                                                          | 0.008157 |          | 0.008157 | -100.0 |
| Lignocaine + Chloramphenicol + Beclomethasone Dipropiote + Clotrimazole (J01BA01) | 0.003076 | 0.002752 | 0.005828 | -10.5  |
| Clindamycin (J01FF01)                                                             | 0.00078  | 0.002762 | 0.003542 | 254.1  |
| Spectinomycin (J01XX04)                                                           | 0.001507 | 0.00086  | 0.002367 | -42.9  |
| Cefepime (J01DE01)                                                                | 0.001017 | 0.000937 | 0.001954 | -7.9   |
| Flucloxacillin (J01CF05)                                                          | 0.001857 |          | 0.001857 | -100.0 |
| Vancomycin (J01XA01)                                                              | 0.000392 | 0.001189 | 0.001581 | 203.3  |
| Cefoperazone + combinations (J01DD62)                                             | 0.000996 | 0.000461 | 0.001457 | -53.7  |
| Cefoperazone + Sulbactam (J01DD62)                                                | 0.000497 | 0.000615 | 0.001112 | 23.7   |
| Bacitracin + Neomycin + Polymyxin B (J01XX10 )                                    | 0.000561 | 0.000423 | 0.000984 | -24.6  |
| Cefpirome (J01DE02)                                                               |          | 0.000867 | 0.000867 | NA     |
| Cilastatin + Imipenem (J01DH51)                                                   | 0.0003   | 0.000487 | 0.000787 | 62.3   |
| Cloxacillin (J01CF02)                                                             |          | 0.000709 | 0.000709 | NA     |
| Amikacin (J01GB06)                                                                | 0.00027  | 0.000181 | 0.000451 | -33.0  |
| Cefazolin (J01DB04)                                                               | 0.000174 | 0.000275 | 0.000449 | 58.0   |

|                                                                    |                  |                  |                  |        |
|--------------------------------------------------------------------|------------------|------------------|------------------|--------|
| Tylosin Tartrate + Doxycycline Hyclate (J01AA02)                   |                  | 0.000389         | 0.000389         | NA     |
| PolyMyxin B (J01XB02)                                              | 0.000199         | 0.0001           | 0.000299         | -49.7  |
| Neomycin (J01GB05)                                                 |                  | 0.000267         | 0.000267         | NA     |
| Roxithromycin (J01FA06)                                            | 0.000199         |                  | 0.000199         | -100.0 |
| Sulfadiazine + Trimethoprim (J01EE02)                              | 0.000051         | 0.000136         | 0.000187         | 166.7  |
| Kanamycin (J01GB04)                                                | 0.000153         |                  | 0.000153         | -100.0 |
| Sulfadimidine (J01EB03)                                            |                  | 0.000123         | 0.000123         | NA     |
| Trimethoprim (J01EA01)                                             | 0.00007          | 0.000035         | 0.000105         | -50.0  |
| Cefaclor (J01DC04)                                                 | 0.000077         | 0.000027         | 0.000104         | -64.9  |
| Imipenem + enzyme inhibitor (J01DH56)                              | 0.000089         |                  | 0.000089         | -100.0 |
| Ceftazidime (J01DD02)                                              | 0.000056         | 0.000024         | 0.00008          | -57.1  |
| Linezolid (J01XX08)                                                | 0.00007          |                  | 0.00007          | -100.0 |
| Tobramycin (J01GB01)                                               | 0.000001         | 0.000002         | 0.000003         | 100.0  |
| Isoniazid + Pyridoxine + Sulfamethoxazole + Trimethoprim (J04AM08) |                  | 0.000001         | 0.000001         | NA     |
| Ampicillin + Sulbactam (J01CR01)                                   | 0                |                  | 0                | NA     |
| Azithromycin + fluconazole + secnidazole (J01RA07)                 |                  | 0                | 0                | NA     |
| Erythromycin + combinations (J01FA01)                              |                  | 0                | 0                | N.A.   |
| <b>Period Total</b>                                                | <b>52.934564</b> | <b>64.087946</b> | <b>117.02251</b> | 21.1   |

520

521

522 **Supplementary Table 3: Consumption aggregated at ATC level 3 in the pre-COVID-19 and**  
 523 **post-COVID-19 era in Tanzania**

| ATC level 3 Description (Code)                     | Pre COVID        | Post COVID       | Class Total      | Change % |
|----------------------------------------------------|------------------|------------------|------------------|----------|
| Sulfonamides And Trimethoprim (J01E)               | 21.902181        | 24.134508        | 46.036689        | 10.19226 |
| Beta-Lactam Antibacterials, Penicillins (J01C)     | 17.519188        | 22.481199        | 40.000387        | 28.32329 |
| Quinolone Antibacterials (J01M)                    | 4.344915         | 4.624895         | 8.96981          | 6.443854 |
| Other Antibacterials (J01X)                        | 3.886463         | 4.615939         | 8.502402         | 18.76966 |
| Macrolides, Lincosamides And Streptogramins (J01F) | 2.38482          | 5.02076          | 7.40558          | 110.5299 |
| Other Beta-Lactam Antibacterials (J01D)            | 2.119506         | 2.156056         | 4.275562         | 1.724458 |
| Aminoglycoside Antibacterials (J01G)               | 0.198701         | 0.569163         | 0.767864         | 186.4419 |
| Tetracyclines (J01A)                               | 0.145005         | 0.250806         | 0.395811         | 72.96369 |
| Combinations Of Antibacterials (J01R)              | 0.219978         | 0.157205         | 0.377183         | -28.536  |
| Amphenicols (J01B)                                 | 0.213806         | 0.077416         | 0.291222         | -63.7915 |
| <b>Period Total</b>                                | <b>52.934563</b> | <b>64.087947</b> | <b>117.02251</b> | 21.07014 |



524  
525  
526 **Supplementary Table 4: Consumption aggregated at ATC level 3 from 2018 to 2021 in**  
527 **Tanzania**

| <b>ATC Class level 3</b>                           | <b>2018</b>      | <b>2019</b>      | <b>2020</b>      | <b>2021</b>      | <b>Four Years Total</b> |
|----------------------------------------------------|------------------|------------------|------------------|------------------|-------------------------|
| Sulfonamides And Trimethoprim (J01E)               | 14.617083        | 7.285097         | 12.50324         | 11.631268        | 46.036688               |
| Beta-Lactam Antibacterials, Penicillins (J01C)     | 10.173568        | 7.34562          | 11.12656         | 11.35464         | 40.000388               |
| Quinolone Antibacterials (J01M)                    | 1.462383         | 2.882532         | 2.309063         | 2.315832         | 8.96981                 |
| Other Antibacterials (J01X)                        | 1.784649         | 2.101814         | 1.960377         | 2.655562         | 8.502402                |
| Macrolides, Lincosamides And Streptogramins (J01F) | 1.064215         | 1.320605         | 1.65612          | 3.364641         | 7.405581                |
| Other Beta-Lactam Antibacterials (J01D)            | 0.872695         | 1.24681          | 1.157145         | 0.998911         | 4.275561                |
| Aminoglycoside Antibacterials (J01G)               | 0.155795         | 0.042906         | 0.07892          | 0.490243         | 0.767864                |
| Tetracyclines (J01A)                               | 0.042675         | 0.10233          | 0.10106          | 0.149746         | 0.395811                |
| Combinations Of Antibacterials (J01R)              | 0.060057         | 0.159921         | 0.024369         | 0.132836         | 0.377183                |
| Amphenicols (J01B)                                 | 0.165188         | 0.048619         | 0.051204         | 0.026212         | 0.291223                |
| Drugs For Treatment Of Tuberculosis (J04A)         |                  |                  |                  | 0.000001         | 0.000001                |
| <b>Year Total</b>                                  | <b>30.398308</b> | <b>22.536254</b> | <b>30.968058</b> | <b>33.119892</b> | <b>117.022512</b>       |

528  
529  
530 **Supplementary Table 5: Consumption aggregated at ATC level 4 from 2018 to 2021 in**  
531 **Tanzania.**

| <b>ATC Class level 4</b>                     | <b>2018</b> | <b>2019</b> | <b>2020</b> | <b>2021</b> | <b>Four years Total</b> |
|----------------------------------------------|-------------|-------------|-------------|-------------|-------------------------|
| Amphenicols (J01BA)                          | 0.165188    | 0.048619    | 0.051204    | 0.026212    | 0.291223                |
| Beta-Lactamase Resistant Penicillins (J01CF) | 0.000632    | 0.001225    | 0.000709    |             | 0.002566                |
| Beta-Lactamase Sensitive Penicillins (J01CE) | 0.97563     | 0.863383    | 1.066293    | 1.04669     | 3.951996                |
| Carbapenems (J01DH)                          | 0.006551    | 0.001447    | 0.00222     | 0.008116    | 0.018334                |

|                                                                          |                  |                  |                  |                 |                   |
|--------------------------------------------------------------------------|------------------|------------------|------------------|-----------------|-------------------|
| Combinations Of Antibacterials (J01RA)                                   | 0.060057         | 0.159921         | 0.024369         | 0.132836        | 0.377183          |
| Combinations Of Drugs For Treatment Of Tuberculosis (J04AM)              |                  |                  |                  | 0.000001        | 0.000001          |
| Combinations Of Penicillins, Incl. Beta-Lactamase Inhibitors (J01CR)     | 3.626861         | 2.345343         | 3.431805         | 4.122006        | 13.526015         |
| Combinations Of Sulphonamides And Trimethoprim Incl. Derivatives (J01EE) | 14.617026        | 7.285085         | 12.503105        | 11.631245       | 46.036461         |
| First Generation Cephalosporins (J01DB)                                  | 0.310298         | 0.687607         | 0.376731         | 0.312137        | 1.686773          |
| Fluoroquinolones (J01MA)                                                 | 1.454226         | 2.882532         | 2.309063         | 2.315832        | 8.961653          |
| Fourth Generation Cephalosporins (J01DE)                                 | 0.000656         | 0.000361         | 0.00063          | 0.001174        | 0.002821          |
| Glycopeptide Antibacterials (J01XA)                                      | 0.000293         | 0.000098         | 0.000166         | 0.001022        | 0.001579          |
| Imidazole Derivatives (J01XD)                                            | 1.710669         | 1.952389         | 1.893326         | 2.567989        | 8.124373          |
| Lincosamides (J01FF)                                                     | 0.000276         | 0.000503         | 0.000896         | 0.001866        | 0.003541          |
| Macrolides (J01FA)                                                       | 1.063939         | 1.320101         | 1.655224         | 3.362775        | 7.402039          |
| Other Aminoglycosides (J01GB)                                            | 0.155795         | 0.042906         | 0.07892          | 0.490243        | 0.767864          |
| Other Antibacterials (J01XX)                                             | 0.001017         | 0.001122         | 0                | 0.001283        | 0.003422          |
| Other Quinolones (J01MB)                                                 | 0.008157         |                  |                  |                 | 0.008157          |
| Penicillins With Extended Spectrum (J01CA)                               | 5.570445         | 4.135668         | 6.627752         | 6.185944        | 22.519809         |
| Second Generation Cephalosporins (J01DC)                                 | 0.042137         | 0.031622         | 0.009737         | 0.03655         | 0.120046          |
| Short-Acting Sulfonamides (J01EB)                                        |                  |                  | 0.000123         |                 | 0.000123          |
| Tetracyclines (J01AA)                                                    | 0.042675         | 0.10233          | 0.10106          | 0.149746        | 0.395811          |
| Third Generation Cephalosporins (J01DD)                                  | 0.513052         | 0.525773         | 0.767827         | 0.640932        | 2.447584          |
| (Not classified)                                                         | 0.072727         | 0.148216         | 0.066897         | 0.085291        | 0.373131          |
| <b>Year Total</b>                                                        | <b>30.398307</b> | <b>22.536251</b> | <b>30.968057</b> | <b>33.11989</b> | <b>117.022505</b> |

532

533 **Supplementary Table 6: Top (local) importers of antibiotics utilised in Tanzania between**  
 534 **2018 and 2021, with the proportion of each importer in DID in four years and the cumulative**  
 535 **contribution for each local importer.**

| Importer                  | 2018      | 2019     | 2020     | 2021     | Total     | Proportion  | Cumulative % contribution |
|---------------------------|-----------|----------|----------|----------|-----------|-------------|---------------------------|
| Medical Stores Department | 12.832301 | 4.068537 | 2.884632 | 3.929656 | 23.715126 | 20.26544022 | 20.2654402                |
| Importer 2                | 3.61511   | 3.910759 | 8.653665 | 5.725965 | 21.905499 | 18.71904794 | 38.9844882                |
| Importer 3                | 3.08651   | 2.834042 | 5.760543 | 3.326914 | 15.008009 | 12.82489114 | 51.8093793                |
| Importer 4                | 1.490486  | 2.196296 | 2.374687 | 3.217808 | 9.279277  | 7.929480676 | 59.73886                  |
| Importer 5                |           |          | 0.880014 | 5.746847 | 6.626861  | 5.662894452 | 65.4017544                |
| Importer 6                | 1.105711  | 0.629544 | 1.501565 | 1.104843 | 4.341663  | 3.710109404 | 69.1118638                |
| Importer 7                | 2.82273   | 0.603366 | 0.374427 | 0.270447 | 4.07097   | 3.478792362 | 72.5906562                |
| Importer 8                |           | 1.462745 | 1.136031 | 1.264955 | 3.863731  | 3.301699077 | 75.8923553                |
| Importer 9                | 0.130747  | 1.015805 | 0.541305 | 1.593834 | 3.281691  | 2.804324666 | 78.6966799                |

|             |          |          |          |          |          |             |            |
|-------------|----------|----------|----------|----------|----------|-------------|------------|
| Importer 10 | 0.438368 | 0.577306 | 0.945605 | 0.792103 | 2.753382 | 2.352865354 | 81.0495453 |
| Importer 11 | 0.948832 | 0.737385 | 0.49991  | 0.553922 | 2.740049 | 2.341471819 | 83.3910171 |
| Importer 12 | 0.357483 | 0.482545 | 0.94044  | 0.807016 | 2.587484 | 2.211099462 | 85.6021166 |
| Importer 13 | 0.314455 | 0.718956 | 1.039605 | 0.300066 | 2.373082 | 2.027885132 | 87.6300017 |
| Importer 14 | 0.186325 | 0.427968 | 0.267492 | 0.554332 | 1.436117 | 1.227214362 | 88.8572161 |
| Importer 15 | 0.164737 | 0.143458 | 0.482578 | 0.611514 | 1.402287 | 1.198305393 | 90.0555215 |

536

537

538

539 **Supplementary Table 7: Top fifteen (foreign) suppliers of antibiotics utilised in Tanzania**  
 540 *between 2018 and 2021, with the proportion of each supplier in DID in four years and the*  
 541 *cumulative contribution for each company.*

| Suppliers          | 2018     | 2019     | 2020     | 2021     | Total    | Proportion of total DDI (%) | Cumulative % contribution |
|--------------------|----------|----------|----------|----------|----------|-----------------------------|---------------------------|
| Supplier 1, China  | 11.98331 | 3.45388  | 1.077391 | 0.292197 | 16.80677 | 14.36                       | 14.36                     |
| Supplier 2, India  | 2.731248 | 1.581349 | 2.996334 | 1.57263  | 8.881561 | 7.59                        | 21.95                     |
| Supplier 3, Kenya  | 0.193801 | 1.371094 | 0.696028 | 5.364539 | 7.625462 | 6.52                        | 28.47                     |
| Supplier 4, Kenya  | 0.160403 | 3.281153 | 2.964335 | 3.578167 | 9.984058 | 8.53                        | 37.00                     |
| Supplier 5, Kenya  | 0.915313 | 1.474415 | 2.85964  | 1.344799 | 6.594167 | 5.63                        | 42.63                     |
| Supplier 6, India  | 0.185795 | 1.311286 | 1.165614 | 3.017761 | 5.680456 | 4.85                        | 47.49                     |
| Supplier 7, India  | 0.571838 | 0.359887 | 2.322161 | 1.172949 | 4.426835 | 3.78                        | 51.27                     |
| Supplier 8, India  | 0.358325 | 0.462936 | 1.478326 | 2.053054 | 4.352641 | 3.72                        | 54.99                     |
| Supplier 9, Kenya  | 3.539278 | 0.218147 | 0.358759 | 0.063429 | 4.179613 | 3.57                        | 58.56                     |
| Supplier 10, India | 0.607576 | 0.62307  | 0.77138  | 1.735099 | 3.737125 | 3.19                        | 61.76                     |
| Supplier 11, India | 0.619548 | 0.425639 | 1.864228 |          | 2.909415 | 2.49                        | 64.24                     |
| Supplier 12, India | 0.760897 | 0.729129 | 0.559022 | 0.656169 | 2.705217 | 2.31                        | 66.55                     |
| Supplier 13, India |          | 0.83642  | 0.705891 | 1.047714 | 2.590025 | 2.21                        | 68.77                     |
| Supplier 14, India | 0.383732 | 0.805343 | 0.555065 | 0.608778 | 2.352918 | 2.01                        | 70.78                     |

542

543 **Supplementary Table 8: Predicted Defined Dose per 1000 inhabitants per day (DID) from**  
544 **2022 through 2027 from autoregressive integrated moving average ARIMA (0, 1, 0) model**

| <b>Year</b> | <b>Actual<br/>Daily<br/>Defined<br/>Dose per<br/>1000<br/>inhabitants<br/>per day<br/>(DID)</b> | <b>Predicted<br/>DID</b> | <b>Lower<br/>Control<br/>Limit (LCL)<br/>of DID</b> | <b>Upper<br/>Control<br/>Limit<br/>(UCL) DID</b> |
|-------------|-------------------------------------------------------------------------------------------------|--------------------------|-----------------------------------------------------|--------------------------------------------------|
| 2018        | 30.398308                                                                                       |                          |                                                     |                                                  |
| 2019        | 22.536254                                                                                       | 31.305503                | -4.05338                                            | 66.66438                                         |
| 2020        | 30.968058                                                                                       | 23.443449                | -11.9154                                            | 58.80233                                         |
| 2021        | 33.119892                                                                                       | 31.875253                | -3.48363                                            | 67.23413                                         |
| 2022        |                                                                                                 | 34.027087                | -1.33179                                            | 69.38597                                         |
| 2023        |                                                                                                 | 34.934281                | -15.0707                                            | 84.93929                                         |
| 2024        |                                                                                                 | 35.841476                | -25.4019                                            | 97.08485                                         |
| 2025        |                                                                                                 | 36.748671                | -33.9691                                            | 107.4664                                         |
| 2026        |                                                                                                 | 37.655865                | -41.409                                             | 116.7207                                         |
| 2027        |                                                                                                 | 38.56306                 | -48.0482                                            | 125.1743                                         |

545

546

547
